# Supplementary material for: Exclusive and Dual Cigarette and Hookah Smoking Is Associated with Adverse Perinatal Outcomes among Pregnant Women in Cairo, Egypt
Source: MDPI journal article supplement (doi:10.3390/ijerph182412974), 2021-12-09
Supplement: s1 [file s1]

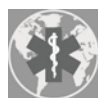

**Supplemental Table S1. Smoking characteristics by product type in pregnant women smokers (N = 58).**

|                                                                       | Cigarette-Only<br>Smokers<br>(n = 20) | Hookah-Only<br>Smokers<br>(n = 29) | Dual Smokers<br>(n = 9) |
|-----------------------------------------------------------------------|---------------------------------------|------------------------------------|-------------------------|
| Frequency of cigarette smoking, %(n)                                  |                                       |                                    |                         |
| Monthly                                                               | 30.0% (6)                             | --                                 | 0% (0)                  |
| Weekly                                                                | 15.0% (3)                             | --                                 | 22.2% (2)               |
| Daily                                                                 | 55.0% (11)                            | --                                 | 77.8% (7)               |
| Frequency of hookah smoking, %(n)                                     |                                       |                                    |                         |
| Monthly                                                               | --                                    | 0% (0)                             | 66.7% (6)               |
| Weekly                                                                | --                                    | 6.9% (2)                           | 22.2% (2)               |
| Daily                                                                 | --                                    | 93.1% (27) <sup>a</sup>            | 11.1% (1) <sup>a</sup>  |
| # of days of cigarette smoked in past month,<br>mean (SD)             | 16.5 (13.2)                           | --                                 | 24.4 (11.0)             |
| # of cigarettes smoked per day, on days<br>smoked, mean (SD)          | 4.9 (4.4)                             | --                                 | 3.1 (2.6)               |
| # of bowls of tobacco smoked using hookah<br>in past month, mean (SD) | --                                    | 9.7 (1.2) <sup>a</sup>             | 4.0 (3.7) <sup>a</sup>  |
| How long smoking cigarettes at current fre-<br>quency, %(n)           |                                       |                                    |                         |
| <6 months                                                             | 55.0% (11)                            | --                                 | 66.7% (6)               |
| 6 months to <1 year                                                   | 0% (0)                                | --                                 | 11.1% (1)               |
| 1 to <2 years                                                         | 0% (0)                                | --                                 | 11.1% (1)               |
| 2 to <3 years                                                         | 30.0% (6)                             | --                                 | 0% (0)                  |
| 3 to <4 years                                                         | 15.0% (3)                             | --                                 | 11.1% (1)               |
| 4 years or longer                                                     | 0% (0)                                | --                                 | 0% (0)                  |
| How long using hookah at current fre-<br>quency, %(n)                 |                                       |                                    |                         |
| <6 months                                                             | --                                    | 6.9% (2)                           | 75.0% (6)               |
| 6 months to <1 year                                                   | --                                    | 0% (0)                             | 12.5% (1)               |
| 1 to <2 years                                                         | --                                    | 0% (0)                             | 0% (0)                  |
| 2 to <3 years                                                         | --                                    | 0% (0)                             | 0% (0)                  |
| 3 to <4 years                                                         | --                                    | 93.1% (27)                         | 12.5% (1)               |
| 4 years or longer                                                     | --                                    | 0% (0) <sup>a</sup>                | 0% (0) <sup>a</sup>     |
| Intentions to quit smoking cigarettes, %(n)                           |                                       |                                    |                         |
| Not at all                                                            | 5.0% (1)                              | --                                 | 0% (0)                  |
| In the next month                                                     | 0% (0)                                | --                                 | 0% (0)                  |
| In the next 6 months                                                  | 0% (0)                                | --                                 | 55.6% (5)               |
| In the future                                                         | 95.0% (19) <sup>a</sup>               | --                                 | 44.4% (4) <sup>a</sup>  |
| Intentions to quit smoking hookah, %(n)                               |                                       |                                    |                         |

---

|                      |    |            |          |
|----------------------|----|------------|----------|
| Not at all           | -- | 3.5% (1)   | 0% (0)   |
| In the next month    | -- | 0% (0)     | 0% (0)   |
| In the next 6 months | -- | 0% (0)     | 0% (0)   |
| In the future        | -- | 96.5% (28) | 100% (8) |

---

<sup>a</sup> Within each row, values with the same superscript letter are significantly different from each other at  $p < 0.05$ .
